# Supplementary material for: Liverwort flora of Ayan – a gained link between subarctic and hemiboreal floras in West Okhotiya (Pacific Russia)
Source: Biodivers Data J. 2021 Apr 1;9:e65199. doi: 10.3897/BDJ.9.e65199 (PMC8032650; doi:10.3897/BDJ.9.e65199)
Supplement: Supplementary material 1 — The distribution of liverworts in compared floras [file bdj-09-e65199-s001.xlsx]

## Sheet: Matrix
Accepted name	In	Ic	Is	SHIK	KUN	ANIV	NAB	PAR	SCHM	LANZ	NAL	BAK	ANN	OLS	DEO	CHAN	SHIR	NH	RISH	BYSTR	COM	NSA	SSA	VMG	AYAN
Acrolejeunea sandvicensis (Gottsche) Steph.	0	0	0	0	0	0	0	0	0	0	0	0	0	0	1	1	0	0	0	0	0	0	1	1	0
Alobiellopsis parvifolia (Steph.) R.M.Schust.	1	1	0	0	0	0	0	0	0	0	0	0	0	0	0	0	0	0	0	0	0	0	0	0	0
Anastrophyllum assimile (Mitt.) Steph.	0	0	0	0	0	0	0	0	0	0	0	0	0	0	1	1	0	1	0	0	0	1	1	0	0
Anastrophyllum michauxii (F.Weber) H.Buch	0	0	0	0	1	0	1	0	0	0	0	0	0	0	0	1	1	1	0	0	0	1	1	0	1
Anastrophyllum sphenoloboides R.M. Schust.	0	0	0	0	0	0	0	0	0	0	0	0	0	0	0	0	0	0	0	1	0	0	0	0	0
Aneura maxima (Schiffn.) Steph.	1	0	0	1	0	0	0	0	0	0	0	0	0	0	0	0	1	0	1	0	0	0	0	0	0
Aneura pinguis (L.) Dumort.	1	1	1	1	1	1	0	1	1	0	1	1	0	1	1	1	1	0	0	1	1	1	1	1	1
Anthelia julacea (L.) Dumort.	1	0	0	0	0	0	0	1	0	0	0	0	0	0	0	1	0	0	0	0	1	0	0	0	0
Anthelia juratzkana (Limpr.) Trevis.	1	1	1	1	1	0	1	1	0	1	1	0	1	1	0	1	1	0	1	1	1	1	0	0	1
Apotreubia nana (S. Hatt. et H. Inoue) S. Hatt. et Mizut.	0	0	0	0	0	0	0	0	0	0	0	0	0	0	0	0	0	0	0	0	0	1	1	0	0
Arnellia fennica (Gottsche) Lindb.	0	0	0	0	0	0	0	0	0	0	0	0	0	1	0	0	0	0	0	0	0	0	0	0	0
Asterella cruciata (Steph.) Horik.	0	0	0	0	0	0	0	0	0	0	0	0	0	0	1	0	0	0	0	0	0	0	1	1	0
Asterella leptophylla (Mont.) Grolle	0	0	0	0	0	0	0	0	0	0	0	0	0	0	0	1	0	0	0	0	0	0	1	1	0
Asterella saccata (Wahlenb.) A.Evans	0	0	0	0	0	0	0	0	0	0	0	0	0	0	0	0	0	0	0	0	0	0	0	0	0
Barbilophozia barbata (Schmidel ex Schreb.) Loeske	0	0	1	0	0	0	1	0	0	1	0	0	1	1	0	1	0	0	1	1	0	1	1	0	1
Barbilophozia hatcheri (A.Evans) Loeske	0	1	0	0	0	0	0	1	1	1	1	0	1	1	0	0	0	0	0	1	1	1	1	0	1
Barbilophozia lycopodioides (Wallr.) Loeske	0	0	0	0	0	0	0	1	0	0	0	1	0	0	0	0	0	0	0	1	0	0	1	0	0
Barbilophozia rubescens (R.M. Schust. et Damsh.) Karttunen et Soederstroem	0	0	0	0	0	0	0	0	0	0	0	0	0	0	0	0	0	0	0	1	0	0	0	0	0
Bazzania bidentula (Steph.) Yasuda	0	0	0	0	0	0	0	0	0	0	0	0	0	0	1	0	0	0	0	0	0	0	1	0	0
Bazzania denudata (Lindenb. et Gottsche) Trevis.	1	1	1	1	1	1	1	0	0	0	0	0	0	0	1	0	1	1	1	0	0	1	1	1	1
Bazzania japonica (Sande Lac.) Lindb.	0	0	1	1	1	1	0	0	0	0	0	0	0	0	1	0	0	0	0	0	0	0	0	0	0
Bazzania parabidentula Bakalin	0	1	0	0	0	0	0	0	0	0	0	0	0	0	0	1	1	0	0	0	0	1	1	1	0
Bazzania manczurica Bakalin	0	0	0	0	0	0	0	0	0	0	0	0	0	0	0	0	0	0	0	0	0	0	1	0	0
Bazzania tricrenata (Wahlenb.) Lindb.	1	1	0	1	1	0	1	0	0	0	0	0	0	0	1	1	0	0	0	0	0	1	1	0	1
Bazzania trilobata (L.) Gray	1	1	1	1	1	1	1	0	1	1	0	0	0	0	0	0	1	1	1	0	0	1	1	0	0
Biantheridion undulifolium (Nees) Konstant. et Vilnet	0	0	0	0	0	0	0	0	0	0	0	0	0	1	0	0	0	0	0	0	0	1	0	0	0
Blasia pusilla L.	1	1	0	1	1	1	0	0	1	1	0	1	1	0	0	1	1	0	0	1	1	0	1	0	0
Blepharostoma minus Horik.	1	1	1	1	1	1	0	0	1	0	0	1	0	0	1	0	0	1	1	0	0	0	1	1	0
Blepharostoma brevirete	0	0	0	0	0	0	1	0	0	0	1	1	1	1	0	0	0	0	0	1	0	1	0	0	1
Blepharostoma trichophyllum	1	1	1	1	1	1	1	1	1	1	1	1	1	1	1	1	1	1	1	1	1	1	1	1	1
Bucegia romanica Radian	0	0	0	0	0	0	0	0	0	0	0	0	0	1	0	0	0	0	0	0	0	0	0	0	0
Calycularia crispula Mitt.	0	0	0	0	0	0	0	0	0	0	0	0	0	0	0	0	0	1	0	0	0	0	0	0	0
Calycularia laxa Lindb. et Arnell	0	0	1	1	1	0	1	0	0	1	1	1	1	0	1	0	0	0	1	1	1	1	1	1	1
Calypogeia angusta Steph.	0	0	0	0	0	0	0	0	0	0	0	0	0	0	0	0	1	0	1	0	0	0	0	0	0
Calypogeia arguta Nees et Mont.	0	1	1	0	1	0	0	0	0	0	0	0	0	0	1	0	1	1	0	0	0	0	0	0	0
Calypogeia orientalis Buczk. & Bakalin	1	1	1	1	1	0	0	0	0	0	0	0	0	0	1	1	1	0	1	0	0	1	1	1	0
Calypogeia integristipula Steph.	1	1	1	1	1	1	1	0	1	1	0	1	0	0	0	1	0	1	1	1	1	1	1	0	1
Calypogeia japonica Steph.	1	0	0	0	0	0	0	0	0	0	0	0	0	0	0	0	0	0	0	0	0	0	0	0	0
Calypogeia muelleriana (Schiffn.) Müll.Frib.	0	1	0	1	1	1	0	1	1	1	1	1	1	1	0	1	0	0	0	1	1	1	1	0	1
Calypogeia neesiana (C.Massal. et Carestia) Müll.Frib.	1	1	1	1	1	1	1	0	1	1	0	0	1	0	0	0	1	1	1	0	0	0	1	0	0
Calypogeia neogaea (R.M.Schust.) Bakalin	1	1	1	1	1	0	0	0	1	0	1	0	0	0	0	0	0	0	0	0	0	0	0	0	1
Calypogeia sphagnicola (Arnell et J.Perss.) Warnst. et Loeske	0	1	0	1	0	1	0	0	1	1	0	1	1	1	0	1	0	0	0	1	1	1	0	0	0
Calypogeia suecica (Arnell et J.Perss.) Müll.Frib.	0	0	0	1	1	1	0	0	0	0	0	0	0	0	0	1	0	0	0	0	0	1	1	0	1
Calypogeia tosana (Steph.) Steph.	1	0	0	0	0	0	0	0	0	0	0	0	0	0	1	0	1	0	1	0	0	0	0	1	0
Calypogeia tsukushiensis Amakawa	0	0	0	0	0	0	0	0	0	0	0	0	0	0	0	0	1	0	0	0	0	0	0	0	0
Cavicularia densa Steph.	0	0	0	0	0	0	0	0	0	0	0	0	0	0	0	0	1	0	0	0	0	0	0	0	0
Cephalozia abmigua C. Mass.	0	0	0	0	0	0	0	0	0	0	0	0	0	0	0	0	0	0	0	0	1	0	0	0	0
Cephalozia bicuspidata (L.) Dumort.	1	1	1	1	1	1	1	1	1	1	1	1	1	1	0	1	0	0	0	1	1	1	1	0	1
Cephalozia hamatiloba Steph.	1	0	0	0	0	0	0	0	0	0	0	0	0	0	0	0	0	0	0	0	0	0	0	0	0
Cephalozia lacinulata (J.B.Jack ex Gottsche et Rabenh.) Spruce	0	0	0	0	0	0	0	0	0	0	0	0	0	0	1	1	0	0	0	0	0	0	0	1	0
Cephalozia otaruensis Steph.	1	1	0	1	0	1	0	0	0	0	0	0	0	0	1	0	1	1	1	0	0	1	1	1	0
Fuscocephaloziopsis zoopsioides (Horik.) Váňa et L.Söderstr.	0	0	0	0	0	0	0	0	0	0	0	0	0	0	0	1	0	0	0	0	0	0	0	0	0
Cephaloziella arctogena (R.M.Schust.) Konstant.	0	0	0	0	1	0	0	1	0	0	0	1	1	0	0	0	0	0	0	1	0	1	1	0	0
Cephaloziella divaricata (Sm.) Schiffn.	1	1	0	1	1	1	0	1	0	1	1	0	1	1	1	0	0	0	1	1	1	0	1	0	1
Cephaloziella elachista (J.B.Jack ex Gottsche et Rabenh.) Schiffn.	1	1	0	0	1	0	0	0	0	0	0	0	0	0	0	0	0	0	0	0	1	0	0	0	0
Cephaloziella elegans (Heeg.) Schiffn.	0	0	0	0	0	0	0	0	0	0	0	0	0	0	0	0	0	0	0	1	0	0	0	0	0
Cephaloziella grimsulana (J.B.Jack ex Gottsche et Rabenh.) Lacout.	0	0	0	0	0	0	0	0	1	0	0	0	0	1	0	0	0	0	0	0	0	0	0	0	0
Cephaloziella hampeana (Nees) Schiffn. ex Loeske	0	0	0	0	0	0	1	0	0	1	0	0	0	1	1	0	0	0	0	0	0	1	0	0	0
Cephaloziella integerrima (Lindb.) Warnst.	0	0	0	0	0	0	0	0	0	1	0	0	0	0	0	0	0	0	0	0	0	0	0	0	0
Cephaloziella microphylla (Steph.) Douin	0	0	0	0	0	0	0	0	0	0	0	0	0	0	1	0	0	0	0	0	0	0	0	0	0
Cephaloziella rubella (Nees) Warnst.	0	0	0	0	0	0	0	0	1	1	1	0	0	0	0	0	0	0	0	1	0	1	1	0	0
Cephaloziella spinicaulis Douin	0	0	0	0	0	0	0	0	0	0	0	0	0	0	1	0	0	0	0	0	0	1	1	1	0
Cephaloziella spinigera (Lindb.) Jørg.	0	0	0	0	0	0	0	0	0	1	0	0	0	1	1	0	0	0	0	1	1	0	0	0	0
Cephaloziella uncinata R.M.Schust.	0	0	1	0	0	0	0	0	0	1	0	0	1	1	0	0	0	0	0	1	1	0	0	0	0
Cephaloziella varians (Gottsche) Steph.	0	0	0	0	0	0	0	1	1	1	1	1	1	1	0	0	0	0	0	1	1	1	0	0	1
Cheilolejeunea khasiana (Mitt.) N. Kitag.	0	0	0	0	0	0	0	0	0	0	0	0	0	0	0	0	0	1	0	0	0	0	0	0	0
Cheilolejeunea obtusifolia (Steph.) S.Hatt.	1	0	0	1	0	0	0	0	0	0	0	0	0	0	1	0	1	0	0	0	0	1	1	0	0
Chiloscyphus pallescens (Ehrh.) Dumort. var. fragilis (A.Roth) Müll.Frib.	1	0	1	0	1	1	0	1	1	0	0	0	0	1	0	0	0	0	0	1	1	0	1	0	0
Chiloscyphus pallescens (Ehrh.) Dumort. var. pallescens	0	1	0	0	0	0	0	0	0	0	0	0	0	1	0	1	0	0	0	0	0	0	1	1	0
Chiloscyphus polyanthos (L.) Corda var. polyanthos	1	1	1	1	1	1	1	0	1	0	1	0	0	0	1	0	1	1	1	1	1	0	1	1	0
Chiloscyphus polyanthos (L.) Corda var. rivularis (Schrad.) Lindb. et Arnell	0	0	0	0	1	0	0	0	0	0	0	0	0	0	0	1	0	0	0	0	1	0	1	0	0
Cladopodiella francisci (Hook.) Jørg.	0	0	0	0	0	0	0	0	0	0	0	0	0	0	0	0	0	0	0	0	0	0	0	0	1
Clevea hyalina (Sommerf.) Lindb.	0	0	0	0	0	0	0	1	0	0	0	0	0	0	0	0	0	0	0	0	1	0	0	0	0
Clevea nana (Shimizu et S. Hatt.) Borovich. et Bakalin	0	0	0	0	0	0	0	0	0	0	0	0	0	1	0	0	0	0	0	0	0	0	1	1	0
Cololejeunea japonica (Schiffn.) Mizut.	0	0	0	0	0	0	0	0	0	0	0	0	0	0	0	0	0	0	0	0	0	0	0	0	0
Cololejeunea longifolia (Mitt.) Benedix ex Mizut.	0	0	0	0	0	0	0	0	0	0	0	0	0	0	1	0	1	0	0	0	0	0	0	0	0
Cololejeunea macounii (Spruce) A.Evans	0	0	0	0	1	0	0	0	0	0	0	0	0	0	1	0	1	0	0	0	0	1	1	0	0
Cololejeunea ornata A.Evans	0	0	0	0	0	0	0	0	0	0	0	0	0	0	1	0	0	0	0	0	0	1	1	1	0
Cololejeunea subkodamae Mizut.	0	0	0	1	0	0	0	0	0	0	0	0	0	0	0	0	0	0	0	0	0	0	0	0	0
Conocephalum japonicum (Thunb.) Grolle	1	1	1	1	1	1	0	1	0	0	0	0	0	0	1	0	1	1	1	1	1	0	1	1	0
Conocephalum salebrosum Szweyk., Buczk. et Odrzyk.	1	1	1	1	1	1	1	1	1	0	1	1	0	0	1	1	1	1	1	1	1	1	1	1	1
Crossocalyx hellerianus (Nees ex Lindenb.) Meyl.	0	0	1	1	1	1	1	0	0	1	0	0	0	0	0	0	0	0	0	0	0	1	1	0	1
Cryptocolea imbricata R.M.Schust.	0	0	0	0	0	0	0	0	0	0	1	1	0	1	0	0	0	0	0	1	0	1	0	0	1
Cryptocoleopsis imbricata Amakawa	0	0	1	0	1	0	0	1	0	0	0	0	0	0	0	0	0	0	1	1	0	0	0	0	0
Cylindrocolea kiaeri (Austin) Váňa	0	0	0	0	0	0	0	0	0	0	0	0	0	0	0	0	0	0	0	0	0	0	0	1	0
Cylindrocolea recurvifolia (Steph.) Inoue	0	0	0	0	0	0	0	0	0	0	0	0	0	0	1	0	0	0	0	0	0	0	0	0	0
Dicranolejeunea yoshinagana (S.Hatt.) Mizut.	0	0	0	0	0	0	0	0	0	0	0	0	0	0	1	0	0	0	0	0	0	0	0	0	0
Diplophyllum albicans (L.) Dumort.	1	1	1	1	1	0	1	1	0	1	1	1	0	0	1	0	1	0	1	1	1	1	1	0	0
Diplophyllum andrewsii A.Evans	1	1	1	1	1	0	0	0	0	0	0	0	0	0	0	0	0	0	1	0	0	0	0	0	0
Diplophyllum sibiricum Bakalin et Vilnet	0	0	0	0	0	0	0	0	0	1	0	0	0	0	0	0	1	0	0	0	0	1	1	0	1
Diplophyllum serrulatum (Müll.Frib.) Steph.	0	0	0	0	0	0	0	0	0	0	0	0	0	0	1	0	0	0	0	0	0	0	0	0	0
Diplophyllum taxifolium (Wahlenb.) Dumort.	1	1	1	1	1	1	1	1	1	1	1	1	1	0	1	1	1	1	1	1	1	1	1	1	1
Douinia imbricata (M. Howe) Konstant. & Vilnet	0	0	0	0	0	0	0	0	0	0	0	0	0	0	0	0	0	0	0	0	1	0	0	0	0
Douinia plicata (Lindb.) Konstant. et Vilnet	1	1	1	1	1	1	1	1	1	1	1	1	0	0	0	0	1	1	1	1	1	1	1	0	1
Dumortiera hirsuta (Sw.) Nees	0	0	0	0	0	0	0	0	0	0	0	0	0	0	0	0	1	1	0	0	0	0	0	0	0
Endogemma caespiticia (Lindenb.) Konstant., Vilnet et A.V.Troitsky	0	1	1	0	1	0	0	0	1	1	1	0	1	0	0	0	0	0	0	1	0	1	0	0	0
Eocalypogeia schusterana (S.Hatt. et Mizut.) R.M.Schust.	0	0	0	0	0	0	0	0	0	0	0	0	0	1	0	0	0	0	0	0	0	0	0	0	1
Eremonotus myriocarpus (Carrington) Lindb. et Kaal. ex Pearson	1	0	1	1	1	0	1	1	0	0	0	1	0	0	0	1	0	0	0	0	1	0	0	0	1
Fossombronia alaskana Steere et Inoue	0	0	0	0	0	0	0	0	0	0	0	0	0	1	0	0	0	0	0	0	0	0	1	0	0
Fossombronia pusilla (L.) Nees	1	0	0	1	1	0	0	0	0	0	0	0	0	0	0	1	0	0	0	0	0	0	0	0	0
Fossombronia japonica Schiffn.	0	0	0	0	0	0	0	0	0	0	0	0	0	0	0	0	0	1	0	0	0	0	0	0	0
Frullania aeolotis var. aberrans C. Massal.	0	0	0	0	0	0	0	0	0	0	0	0	0	0	0	0	0	0	0	0	0	0	0	0	0
Frullania appendiculata Steph.	1	0	0	1	1	1	1	0	0	0	0	0	0	0	1	0	1	1	0	0	0	0	1	1	0
Frullania bolanderi Austin	0	0	0	1	1	1	1	0	1	1	1	0	0	0	0	1	0	0	0	1	0	1	1	0	1
Frullania crispiplicata Yuzawa et S.Hatt.	0	0	0	0	0	0	0	0	0	0	0	0	0	0	0	0	0	0	0	0	0	0	1	0	0
Frullania davurica Hampe ex Gottsche	1	0	0	1	0	0	0	0	0	0	0	0	0	1	1	0	1	1	0	0	0	1	1	1	1
Frullania dilatata (L.) Dumort.	0	0	0	0	0	1	0	0	0	0	0	0	0	0	0	0	0	0	0	1	0	0	0	0	0
Frullania diversitexta Steph.	0	0	0	0	0	0	0	0	0	0	0	0	0	0	1	0	0	0	0	0	0	0	1	1	0
Frullania eboracensis	0	0	0	0	0	0	0	0	0	0	0	0	0	1	0	0	0	0	0	0	0	0	0	0	0
Frullania fuscovirens Steph.	0	0	0	0	0	0	0	0	0	0	0	0	0	0	0	0	0	0	0	0	0	0	0	0	0
Frullania hamatiloba Steph.	0	0	0	0	0	0	0	0	0	0	0	0	0	0	0	0	1	0	0	0	0	0	0	0	0
Frullania ignatovii Sofronova, Mamontov & Potemkin	0	0	0	0	0	0	0	0	0	0	0	0	0	0	0	0	0	0	0	0	0	0	0	0	1
Frullania inflata Gottsche	0	1	0	1	0	1	0	0	0	0	0	0	0	0	1	0	0	0	0	0	0	0	1	0	0
Frullania kagoshimensis Steph.	0	0	0	0	0	0	0	0	0	0	0	0	0	0	1	0	0	0	0	0	0	0	0	0	0
Frullania koponenii S.Hatt.	0	0	0	1	1	1	0	0	0	0	0	0	0	0	0	1	0	0	0	0	0	1	1	0	0
Frullania muscicola Steph.	0	1	0	1	1	1	0	0	0	0	0	0	0	0	1	1	0	1	1	0	0	1	1	1	0
Frullania oakesiana Austin	0	0	0	0	0	1	0	0	0	0	0	0	0	0	0	0	1	0	1	0	0	1	1	0	0
Frullania parvistipula Steph.	0	0	0	0	0	0	0	0	0	0	0	0	0	0	0	1	0	0	0	0	0	0	1	1	0
Frullania pedicellata Steph.	0	0	0	0	0	0	0	0	0	0	0	0	0	0	0	1	0	0	0	0	0	0	0	0	0
Frullania polyptera Taylor	0	0	0	0	0	0	0	0	0	0	0	0	0	0	1	0	0	0	0	0	0	0	0	0	0
Frullania sinensis Steph.	0	0	0	0	0	0	0	0	0	0	0	0	0	0	0	0	0	0	0	0	0	0	1	1	0
Frullania subarctica Vilnet, Borovich. et Bakalin	0	0	0	0	0	0	1	0	0	0	1	0	0	1	0	0	0	0	0	0	0	1	0	0	1
Frullania takayuensis Steph.	0	0	0	0	0	0	0	0	0	0	0	0	0	0	0	0	0	0	0	0	0	1	1	0	0
Frullania taradakensis Steph.	0	0	0	0	0	0	0	0	0	0	0	0	0	0	1	1	0	0	0	0	0	1	1	1	0
Frullania usamiensis Steph.	0	0	0	0	0	0	0	0	0	0	0	0	0	0	1	0	0	0	0	0	0	0	0	0	0
Fuscocephaloziopsis albescens (Hook.) Váňa et L.Söderstr. var. albescens	1	1	1	0	1	0	1	1	0	1	0	1	1	0	0	0	0	0	0	1	1	0	0	0	0
Fuscocephaloziopsis catenulata (Huebener) Váňa et L.Söderstr. subsp. catenulata	0	0	0	0	0	0	0	0	0	0	0	0	0	0	1	1	1	0	0	0	0	1	1	1	0
Fuscocephaloziopsis catenulata (Huebener) Váňa et L.Söderstr.subsp. nipponica (S.Hatt.) Váňa et L.Söderstr.	0	0	0	0	0	0	0	0	0	0	0	0	0	0	0	0	0	0	0	0	0	0	0	0	0
Fuscocephaloziopsis connivens (Dicks.) Váňa et L.Söderstr. subsp. connivens	0	0	0	1	0	0	0	0	0	0	0	0	0	0	0	1	0	0	0	0	0	0	1	0	0
Fuscocephaloziopsis leucantha (Spruce) Váňa et L.Söderstr.	1	1	1	1	1	1	1	0	1	1	0	0	0	0	0	1	1	0	1	0	1	1	1	0	1
Fuscocephaloziopsis loitlesbergeri (Schiffn.) Váňa et L.Söderstr.	1	0	0	0	0	0	0	0	1	0	0	0	0	0	0	0	0	0	0	0	0	0	0	0	0
Fuscocephaloziopsis lunulifolia (Dumort.) Váňa et L.Söderstr.	1	1	1	1	1	1	1	1	1	1	0	0	1	1	1	1	1	0	0	1	1	1	1	1	1
Fuscocephaloziopsis pachycaulis (R.M.Schust.) Váňa et L.Söderstr.	0	0	0	0	1	0	0	1	0	0	0	0	1	0	0	0	0	0	0	1	1	0	0	0	1
Fuscocephaloziopsis pleniceps (Austin) Váňa et L.Söderstr.	0	1	0	0	1	1	0	1	1	0	1	1	1	1	0	1	0	0	0	1	1	1	1	0	1
Geocalyx graveolens (Schrad.) Nees	0	0	1	1	1	0	0	0	0	0	0	0	0	0	0	1	0	0	0	0	0	1	1	1	0
Geocalyx lancistipulus (Steph.) S.Hatt.	0	0	0	1	1	1	0	0	0	0	0	0	0	0	1	0	1	0	0	0	0	0	1	0	0
Gymnocolea inflata (Huds.) Dumort. subsp. inflata	1	1	0	0	1	0	0	1	1	1	1	1	1	1	0	0	0	1	0	1	1	1	0	0	1
Gymnocolea marginata (Steph.) S.Hatt.	1	1	0	0	1	0	0	0	0	0	0	0	0	0	0	0	0	0	0	0	0	0	0	0	0
Gymnomitrion adustum Nees emend. Limpr.	0	0	0	0	1	0	0	0	0	0	0	0	0	0	0	0	0	0	0	0	0	0	0	0	0
Gymnomitrion alpinum (Gottsche ex Husn.) Schiffn.	1	0	1	0	1	0	0	1	0	0	1	1	0	0	1	0	0	0	0	1	1	0	0	0	0
Gymnomitrion brevissimum (Dumort.) Warnst.	0	0	0	0	0	0	0	1	0	0	1	1	0	0	0	0	0	0	0	1	1	0	0	0	0
Gymnomitrion commutatum (Limpr.) Schiffn.	1	1	1	0	1	0	0	0	0	1	0	1	1	1	1	1	0	0	1	1	0	1	0	0	1
Gymnomitrion concinnatum (Lightf.) Corda	0	1	1	1	1	0	1	1	0	1	0	1	1	1	0	0	0	0	1	1	1	1	0	0	1
Gymnomitrion corallioides Nees	1	0	0	0	1	0	0	0	0	1	0	1	1	1	0	0	0	0	0	1	1	1	0	0	1
Gymnomitrion faurianum (Steph.) Horik.	1	0	0	1	1	0	0	0	0	0	0	0	0	0	0	0	0	1	1	0	0	0	0	0	0
Gymnomitrion pacificum Grolle	0	0	0	0	0	0	0	1	0	0	0	0	0	0	0	0	0	0	0	0	1	0	0	0	0
Gymnomitrion parvitextum (Steph.) Mamontov, Konstant. & Potemkin	0	0	0	0	0	0	0	0	0	0	0	0	0	0	0	0	0	0	0	0	0	1	1	0	0
Gymnomitrion revolutum (Nees) Philib.	0	0	0	0	0	0	0	0	0	0	0	0	0	0	0	1	0	0	1	0	0	0	0	0	0
Haplomitrium hookeri (Sm.) Nees	1	1	0	0	0	0	0	0	0	0	0	0	0	0	0	0	0	0	0	0	0	0	0	0	0
Harpanthus flotovianus (Nees) Nees	1	1	0	1	1	1	0	1	1	0	1	1	0	0	0	0	1	1	0	1	1	1	1	1	0
Harpanthus scutatus (F.Weber et D.Mohr) Spruce	0	0	0	0	0	0	0	0	0	0	0	0	0	0	0	0	0	0	0	0	0	1	1	1	0
Hattorianthus erimonus (Steph.) R.M.Schust. et Inoue	1	0	0	1	0	0	0	0	0	0	0	0	0	0	1	0	1	1	0	0	0	0	1	1	0
Herbertus aduncus (Dicks.) Gray	0	0	0	1	0	0	0	0	0	0	0	0	0	0	1	0	1	0	0	0	0	0	1	0	0
Herbertus arcticus (Inoue et Steere) Schljakov	0	0	0	0	0	0	0	0	0	0	0	0	0	1	0	0	0	0	0	0	0	1	0	0	0
Herbertus buchii Juslén	0	0	0	1	0	0	0	0	0	0	0	0	0	0	1	0	0	0	0	0	0	0	1	0	0
Herbertus aff. buchii Juslén	0	0	0	0	0	0	0	0	0	0	0	0	0	0	0	0	0	0	0	0	0	0	0	0	1
Herbertus dicranus (Taylor ex Gottsche, Lindenb. et Nees) Trevis.	0	0	0	0	0	0	0	0	0	0	0	0	0	0	1	0	0	0	0	0	0	1	1	0	0
Heterogemma capitata (Hook.) Konstant. et Vilnet	0	0	0	0	0	0	0	0	1	0	0	0	0	0	0	0	0	0	0	0	0	0	0	0	0
Heteroscyphus coalitus (Hook.) Schiffn.	0	0	0	0	0	0	0	0	0	0	0	0	0	0	0	0	1	0	1	0	0	0	0	0	0
Heteroscyphus planus (Mitt.) Schiffn.	0	0	0	0	0	0	0	0	0	0	0	0	0	0	1	0	0	0	0	0	0	0	1	0	0
Hygrobiella intermedia Bakalin et Vilnet	0	0	0	0	0	0	0	0	0	0	1	0	0	0	0	0	0	0	0	1	0	0	0	0	0
Hygrobiella laxifolia (Hook.) Spruce	1	1	1	1	1	0	0	1	0	0	0	0	0	0	0	0	0	0	1	0	0	0	0	0	0
Hygrobiella squamosa Bakalin et Vilnet	1	0	0	0	0	0	0	0	0	0	0	1	0	0	0	0	0	0	0	0	1	0	0	0	0
Isopaches bicrenatus (Schmidel ex Hoffm.) H.Buch	1	1	0	0	1	1	1	1	1	1	1	0	0	0	0	0	0	0	0	1	0	0	1	0	1
Jubula hutchinsiae (Hook.) Dumort. subsp. javanica (Steph.) Verd.	0	0	0	0	0	0	0	0	0	0	0	0	0	0	1	0	1	0	0	0	0	0	0	0	0
Jubula japonica Steph.	0	0	0	0	0	0	0	0	0	0	0	0	0	0	1	0	1	1	0	0	0	0	1	0	0
Jungermannia afoninae Mamontov, Konstant. & Vilnet	0	0	0	0	0	0	0	0	0	0	0	0	0	0	0	0	0	0	0	0	0	0	0	0	1
Jungermannia atrovirens Dumort.	1	0	0	0	0	1	1	0	0	0	1	0	0	1	1	0	1	0	0	0	1	1	1	1	0
Jungermannia borealis Damsh. et Váňa	0	0	0	0	0	0	1	0	0	1	0	0	0	1	0	0	0	0	0	1	1	0	0	0	0
Jungermannia eucordifolia Schljakov	1	1	0	1	1	1	1	1	1	0	1	0	0	1	0	1	0	0	0	1	1	1	0	0	0
Jungermannia exsertifolia Steph.	1	1	1	1	1	0	1	1	1	1	1	1	0	0	1	0	0	0	1	0	1	1	0	0	0
Jungermannia konstantinovae Bakalin et Vilnet	0	0	0	0	0	0	0	0	0	0	0	0	0	0	0	0	0	0	0	0	0	0	0	0	0
Jungermannia polaris Lindb.	0	0	0	0	1	0	1	1	0	0	0	0	0	1	0	0	0	0	0	1	1	0	0	0	0
Jungermannia pumila With.	1	1	0	1	1	0	1	1	1	1	1	1	0	1	0	0	0	0	1	1	1	1	1	1	1
Jungermnannia yamatoyensis	0	0	0	0	0	0	0	0	0	0	0	1	0	0	0	0	0	0	0	0	0	0	0	0	0
Kurzia makinoana (Steph.) Grolle	1	1	1	1	1	0	0	0	1	0	0	0	0	0	1	0	0	1	0	0	1	1	1	1	0
Lejeunea alaskana (R.M.Schust. et Steere) Inoue et Steere	0	0	0	0	0	0	0	0	0	0	0	0	0	1	0	0	0	0	0	0	0	1	0	0	1
Lejeunea cavifolia (Ehrh.) Lindb.	0	0	0	0	1	0	0	0	0	0	0	0	0	0	0	0	0	0	0	0	0	0	1	0	0
Lejeunea compacta (Steph.) Steph.	0	0	0	0	0	0	0	0	0	0	0	0	0	0	1	0	1	0	1	0	0	0	0	0	0
Lejeunea japonica Mitt.	0	0	0	1	0	0	0	0	0	0	0	0	0	0	1	1	1	1	1	0	0	1	1	1	0
Lejeunea neelgherriana Gottsche	0	0	0	0	0	0	0	0	0	0	0	0	0	0	0	0	0	0	0	0	0	0	0	0	0
Lejeunea otiana S.Hatt.	0	0	0	1	0	0	0	0	0	0	0	0	0	0	0	0	0	0	0	0	0	0	0	0	0
Lejeunea parva (S.Hatt.) Mizut.	0	0	0	0	0	0	0	0	0	0	0	0	0	0	1	0	0	0	0	0	0	0	0	0	0
Lepidozia reptans (L.) Dumort.	1	1	1	1	1	1	1	0	1	1	0	0	0	0	1	1	1	1	1	1	0	1	1	1	1
Lepidozia subtransversa Steph.	0	0	0	0	0	0	0	0	0	0	0	0	0	0	0	0	0	0	0	0	0	0	0	1	0
Lepidozia vitrea Steph.	0	0	0	0	0	0	0	0	0	0	0	0	0	0	0	0	0	0	1	0	0	0	0	0	0
Liochlaena subulata (A.Evans) Schljakov	0	1	1	1	1	1	0	0	0	0	0	0	0	0	1	1	1	0	1	0	0	1	1	1	0
Lophocolea bidentata (L.) Dumort.	0	0	0	0	0	0	0	0	0	0	0	0	0	0	1	0	0	0	0	0	0	0	0	0	0
Lophocolea cuspidata (Nees) Limpr.	0	0	1	1	1	0	0	0	1	0	0	0	0	0	0	0	0	0	0	0	0	1	1	0	0
Lophocolea heterophylla (Schrad.) Dumort.	1	1	1	1	1	1	1	1	1	1	1	0	0	1	1	1	1	1	1	1	1	1	1	1	1
Lophocolea horikawana S.Hatt.	0	0	0	0	0	0	0	0	0	0	0	0	0	0	1	0	0	0	0	0	0	0	0	0	0
Lophocolea itoana Inoue	0	1	0	0	0	0	0	0	1	0	0	0	0	0	1	1	0	0	0	0	0	1	1	1	0
Lophocolea minor Nees	0	1	1	1	1	1	0	0	1	0	1	1	0	1	1	0	1	1	1	1	1	1	1	1	1
Lophozia ascendens (Warnst.) R.M.Schust.	0	0	0	0	0	0	0	0	0	0	0	0	0	0	0	1	1	0	0	0	0	1	0	0	0
Lophozia guttulata (Lindb. et Arnell) A.Evans	0	1	1	1	1	1	1	0	1	1	1	0	0	0	0	0	0	0	0	1	1	1	1	0	1
Lophozia heteromorpha R.M.Schust. et Damsh.	0	0	0	0	0	0	0	0	0	0	0	1	0	0	0	0	0	0	0	1	0	0	0	0	0
Lophozia lacerata N.Kitag.	0	1	1	0	0	1	0	0	0	0	0	0	0	0	0	0	0	0	0	1	1	0	0	0	0
Lophozia lantratoviae Bakalin	1	0	0	0	0	0	0	0	0	0	0	1	0	0	0	0	0	0	0	1	0	1	1	0	1
Lophozia murmanica Kaal.	0	0	0	0	0	0	0	0	0	0	1	1	0	1	0	0	0	0	0	1	0	1	0	0	0
Lophozia pacifica Bakalin	0	0	0	0	0	0	0	0	0	0	0	0	0	0	0	0	0	0	0	0	1	0	0	0	0
Lophozia savicziae Schljakov	0	1	1	0	0	0	1	1	0	0	1	1	1	1	0	0	0	0	0	1	1	1	0	0	0
Lophozia schusteriana Schljakov	0	0	0	0	0	0	0	0	0	0	0	0	0	1	0	0	0	0	0	0	0	0	0	0	0
Lophozia silvicola H.Buch	0	1	1	1	1	1	1	0	1	1	0	0	1	1	0	0	0	0	0	1	1	1	1	0	1
Lophozia silvicoloides N.Kitag.	1	1	1	1	1	0	1	0	1	1	0	1	1	1	0	0	0	0	0	1	1	1	0	0	1
Lophozia ventricosa (Dicks.) Dumort.	1	1	0	0	1	0	0	1	1	1	1	1	1	0	0	1	0	0	0	1	1	1	1	0	1
Lophozia ventricosa (Dicks.) Dumort. var. longiflora (Nees) Macoun	0	0	0	0	0	1	1	1	1	1	1	1	0	1	0	1	0	1	0	1	1	1	1	0	0
Lophozia wenzelii (Nees) Steph. var. wenzelii	0	0	0	0	1	0	1	1	0	0	1	0	0	0	0	1	0	0	1	1	1	0	0	0	0
Lophoziopsis excisa (Dicks.) Konstant. et Vilnet var. exisa	0	0	0	0	0	0	0	1	0	0	0	0	1	1	0	0	0	0	0	1	1	1	1	0	1
Lophoziopsis longidens (Lindb.) Konstant. et Vilnet subsp. longidens	0	0	0	0	0	0	0	0	1	1	1	1	1	1	0	0	0	0	0	1	0	1	1	0	1
Lophoziopsis pellucida (R.M.Schust.) Konstant. et Vilnet	0	0	0	0	0	0	0	0	0	0	0	0	0	1	0	0	0	0	0	0	1	0	0	0	0
Lophoziopsis polaris (R.M.Schust.) Konstant. et Vilnet var. polaris	0	0	0	0	0	0	0	0	0	0	0	0	1	1	0	0	0	0	0	0	0	0	0	0	0
Lophoziopsis polaris (R.M.Schust.) Konstant. et Vilnet var. sphagnorum (R.M.Schust.) Konstant. et Vilnet	0	0	0	0	0	0	0	0	0	0	0	0	1	0	0	0	0	0	0	0	0	0	0	0	0
Lophoziopsis propagulifera (Gottsche) Konstant. et Vilnet	0	0	0	0	0	0	1	0	0	0	0	0	0	1	0	0	0	0	0	1	0	0	0	0	0
Lophoziopsis rubrigemma (R.M.Schust.) Konstant. et Vilnet	0	0	0	0	0	0	0	1	0	0	0	0	0	1	0	0	0	0	0	0	0	0	0	0	0
Macrodiplophyllum microdontum (Mitt.) Perss.	0	0	0	0	0	0	1	0	0	1	0	1	1	1	0	0	0	0	0	0	0	1	1	0	1
Makinoa crispata (Steph.) Miyake	0	0	0	0	0	0	0	0	0	0	0	0	0	0	1	0	1	0	0	0	0	0	0	0	0
Mannia androgyna (L.) Evans	0	0	0	0	0	0	0	0	0	0	0	0	0	0	0	0	0	0	0	0	0	0	1	0	1
Mannia fragrans (Balb.) Frye et L.Clark	0	0	0	0	0	0	0	0	0	0	0	0	0	0	0	0	0	0	0	0	0	0	1	1	1
Mannia gracilis (F. Weber) D.B. Schill et D.G. Long	0	0	0	0	0	0	1	0	1	0	0	1	0	1	0	0	0	0	0	1	0	1	0	0	0
Mannia levigata Shimizu et S. Hatt.	0	0	0	0	0	0	0	0	0	0	0	0	0	0	0	0	0	0	0	0	0	0	0	1	0
Mannia pilosa (Hornem.) Frye et L.Clark	0	0	0	0	0	0	0	0	0	0	0	0	0	1	0	0	0	0	0	0	0	0	1	0	1
Mannia sibirica (Müll.Frib.) Frye et L.Clark	0	0	0	0	0	0	0	0	0	0	0	0	0	1	0	0	0	0	0	0	0	0	0	0	1
Mannia triandra (Scop.) Grolle	0	0	0	0	0	0	0	0	0	0	0	0	0	0	0	0	0	1	0	0	0	0	0	0	0
Marchantia paleacea Bertol.	0	0	0	0	1	0	0	0	0	0	0	0	0	0	0	0	0	0	0	0	0	0	0	1	0
Marchantia polymorpha L. subsp. montivagans Bischl. et Boissel.-Dub.	1	0	0	0	0	0	1	1	1	1	1	1	1	1	1	0	0	0	0	1	1	1	1	0	1
Marchantia polymorpha L. subsp. polymorpha	0	0	0	0	1	0	0	0	0	0	0	0	0	0	1	1	0	0	0	0	0	0	0	1	0
Marchantia polymorpha L. subsp. ruderalis Bischl. et Boissel.-Dub.	0	1	0	1	0	1	1	1	1	0	1	0	0	1	0	0	0	0	1	1	1	1	1	1	0
Marsupella alata S.Hatt.	1	0	1	1	1	0	0	0	0	0	0	0	0	0	0	0	1	0	1	0	0	0	0	0	0
Marsupella alpina (Gottsche ex Husn.) H.Bern.	0	0	0	0	0	0	0	0	0	0	0	0	0	0	0	0	0	0	0	0	0	1	0	0	0
Marsupella apertifolia Steph.	1	0	0	0	0	0	0	0	0	0	1	0	0	0	0	0	0	0	0	0	0	1	0	0	0
Marsupella apiculata Schiffn.	1	0	1	0	1	0	0	1	0	1	0	1	1	1	0	0	0	0	0	1	1	0	0	0	0
Marsupella aquatica (Lindenb.) Schiffn.	0	0	0	0	0	0	1	0	0	0	0	0	0	0	0	0	0	0	0	0	0	0	0	0	0
Marsupella arctica (Berggr.) Bryhn et Kaal.	0	0	0	0	0	0	0	0	0	0	0	0	0	1	0	0	0	0	0	0	0	0	0	0	0
Marsupella boeckii (Austin) Lindb. ex Kaal.	0	0	0	1	1	0	0	1	0	1	0	1	1	0	0	0	0	1	0	1	1	1	0	0	1
Marsupella condensata (Ångstr. ex C.Hartm.) Lindb. ex Kaal.	1	0	0	0	0	0	0	0	0	0	1	1	1	0	0	0	0	0	0	1	0	0	0	0	0
Marsupella disticha Steph.	0	0	0	0	0	0	0	0	0	0	0	0	0	0	0	0	0	0	1	0	0	0	0	0	0
Marsupella emarginata (Ehrh.) Dumort.	0	0	0	0	0	0	0	1	0	1	0	0	1	1	1	0	0	0	0	0	1	1	1	0	1
Marsupella funckii (F.Weber et D.Mohr) Dumort.	0	0	0	0	1	0	1	0	0	0	1	0	0	0	0	0	0	0	0	1	0	0	0	0	0
Marsupella pseudofunckii S.Hatt.	0	0	1	0	0	0	0	0	0	0	0	0	0	0	1	0	0	0	0	0	0	0	0	0	0
Marsupella sparsifolia (Lindb.) Dumort.	0	0	0	0	0	0	0	0	0	0	0	0	0	0	0	0	0	0	0	0	1	0	0	0	0
Marsupella sphacelata (Giesecke ex Lindenb.) Dumort.	0	1	1	1	1	0	1	1	0	1	0	0	0	0	0	1	0	0	1	1	0	0	0	0	0
Marsupella sprucei (Limpr.) Bernet	0	1	1	0	0	0	1	1	0	0	0	0	1	1	0	0	0	0	0	0	1	1	0	0	1
Marsupella tubulosa Steph.	1	0	0	0	1	0	1	0	0	0	1	1	0	0	0	0	1	1	1	0	0	1	1	0	0
Marsupella yakushimensis (Horik.) S.Hatt.	0	0	0	0	0	0	0	0	0	0	0	0	0	0	1	0	0	0	0	0	0	0	0	0	0
Mesoptychia badensis (Gottsche ex Rabenh.) L.Söderstr. et Váňa	0	0	0	0	0	0	0	0	0	0	0	0	0	1	0	0	0	0	0	0	0	0	0	0	1
Mesoptychia bantriensis (Hook.) L. Söderstr. & Váňa	0	0	0	0	0	0	0	0	0	0	0	0	0	0	0	0	0	0	0	1	0	0	0	0	0
Mesoptychia collaris (Nees) L.Söderstr. et Váňa	0	0	0	0	0	0	0	0	0	0	0	0	0	1	0	0	0	0	0	0	0	0	0	0	0
Mesoptychia gillmanii (Austin) L.Söderstr. et Váňa	0	0	0	0	0	0	0	0	0	0	0	0	0	1	0	0	0	0	0	1	1	0	0	0	1
Mesoptychia heterocolpos (Thed. ex Hartm.) L.Söderstr. et Váňa	1	0	1	0	0	0	1	1	1	0	0	1	0	1	0	1	0	0	0	1	1	1	1	0	1
Mesoptychia rutheana (Limpr.) L.Söderstr. et Váňa	0	0	0	0	0	0	0	0	0	0	1	0	0	1	0	0	0	0	0	1	0	0	0	0	1
Mesoptychia sahlbergii (Lindb.) A.Evans	0	0	0	0	0	0	0	0	0	0	0	0	0	1	0	0	0	0	0	0	0	0	0	0	0
Mesoptychia ussuriensis (Bakalin) L.Söderstr. et Váňa	0	0	0	0	0	0	0	0	0	0	0	0	0	0	0	0	0	0	0	0	0	0	1	0	0
Metacalypogeia cordifolia (Steph.) Inoue	1	0	0	1	1	0	0	0	0	0	0	0	0	0	1	0	1	0	1	0	0	1	1	1	1
Metasolenostoma ochotense Vilnet et Bakalin	1	0	0	0	0	0	0	0	0	1	0	0	0	0	0	0	0	0	0	0	0	0	0	0	0
Metasolenostoma orientale Bakalin et Vilnet	1	1	0	0	0	0	0	0	0	0	0	0	0	0	0	0	0	0	0	1	0	0	0	0	0
Metzgeria furcata (L.) Dumort.	0	0	0	0	0	0	0	0	1	0	0	0	0	0	1	1	1	0	0	0	0	1	1	0	0
Metzgeria lindbergii Schiffn.	1	1	1	1	1	1	0	0	0	0	0	0	0	0	1	1	1	1	1	0	0	1	1	1	0
Metzgeria pubescens (Schrank) Raddi	0	0	0	1	1	1	0	0	0	0	0	0	0	1	1	1	1	0	1	1	0	1	1	1	1
Metzgeria temperata Kuwah.	0	0	0	1	1	0	0	0	0	0	0	0	0	0	1	0	1	0	0	0	0	1	1	0	0
Microlejeunea ulicina (Taylor) Steph.	0	0	0	1	1	0	0	0	0	0	0	0	0	0	1	0	0	0	0	0	0	0	0	0	0
Moerckia blyttii (Mørch) Brockm.	0	0	0	1	0	0	0	1	0	0	0	0	0	0	0	0	0	0	0	0	1	0	0	0	0
Moerckia flotoviana (Nees) Schiffn.	1	0	0	0	0	0	0	0	0	0	1	0	0	1	0	0	0	0	0	0	0	0	0	0	0
Mylia anomala (Hook.) Gray	1	1	1	1	1	0	0	0	1	1	0	1	1	1	0	0	0	0	0	1	1	0	0	0	1
Mylia taylorii (Hook.) Gray	1	1	0	1	1	0	1	0	0	1	0	1	1	0	0	1	1	0	0	0	0	1	1	1	0
Mylia verrucosa Lindb.	1	1	1	1	1	1	1	0	1	0	0	0	0	0	0	1	1	0	1	0	0	1	1	1	1
Nardia assamica (Mitt.) Amakawa	1	1	1	1	1	0	0	0	0	1	0	0	0	0	1	0	1	0	1	0	0	0	0	0	0
Nardia breidleri (Limpr.) Lindb.	1	0	1	0	0	0	0	1	0	0	1	1	0	0	0	0	0	0	0	1	1	0	0	0	0
Nardia compressa (Hook.) Gray	1	1	0	0	1	0	0	1	0	0	0	0	0	0	0	0	0	0	0	0	1	0	0	0	0
Nardia geoscyphus (De Not.) Lindb.	0	1	0	0	0	0	1	1	0	1	1	1	1	1	0	0	0	0	1	1	1	0	1	0	1
Nardia geoscyphus (De Not.) Lindb. var. dioica Bakalin	0	0	0	1	0	0	0	0	0	0	0	0	0	0	0	0	0	0	0	0	0	0	0	0	0
Nardia harae Amakawa	1	0	1	0	0	0	0	0	0	0	0	0	0	0	0	0	0	0	0	0	0	0	0	0	0
Nardia hiroshii Amakawa	0	1	1	0	0	0	0	0	0	0	0	0	0	0	0	0	0	0	0	1	0	0	0	0	0
Nardia insecta Lindb.	0	0	0	0	0	0	1	0	1	0	0	0	1	1	0	0	0	0	0	1	0	1	0	0	0
Nardia japonica Steph.	1	1	1	1	1	0	1	1	1	1	1	0	1	0	0	0	0	1	1	1	1	1	0	0	0
Nardia pacifica Bakalin	1	0	0	0	0	0	0	0	0	0	1	1	0	0	0	0	0	0	0	0	0	0	0	0	0
Nardia scalaris Gray	0	1	1	1	1	0	0	1	0	0	0	0	0	0	0	0	0	0	1	0	1	1	0	0	0
Nardia subclavata (Steph.) Amakawa	1	1	0	1	1	0	0	0	0	0	0	0	0	0	0	0	1	0	1	0	0	0	0	0	0
Nardia unispiralis Amakawa	1	1	0	0	0	0	0	0	0	0	0	0	0	0	0	0	0	0	1	1	0	0	1	0	0
Neohattoria herzogii (S.Hatt.) Kamim.	1	0	1	1	1	0	0	0	0	0	0	0	0	0	0	0	0	1	0	0	0	1	0	0	0
Neoorthocaulis attenuatus (Mart.) L.Söderstr., De Roo et Hedd.	1	1	0	0	0	0	1	0	1	1	1	0	0	0	0	1	1	0	1	0	0	1	1	0	0
Neoorthocaulis binsteadii (Kaal.) L.Söderstr., De Roo et Hedd.	0	0	0	0	0	0	0	0	1	1	0	0	1	1	0	0	0	0	0	1	1	1	0	0	1
Neoorthocaulis floerkei (F.Weber et D.Mohr) L.Söderstr., De Roo et Hedd.	0	0	0	0	0	0	0	1	0	0	0	0	0	0	0	0	0	0	0	0	1	0	0	0	0
Neoorthocaulis hyperboreus (R.M.Schust.) L.Söderstr., De Roo et Hedd.	0	0	0	0	0	0	0	1	0	0	0	0	0	1	0	0	0	0	0	0	0	0	0	0	0
Nipponolejeunea pilifera (Steph.) S.Hatt.	1	0	0	0	0	0	0	0	0	0	0	0	0	0	1	0	0	0	0	0	0	0	0	0	0
Nipponolejeunea subalpina (Horik.) S.Hatt.	1	1	1	1	1	1	0	0	0	0	0	0	0	0	0	0	0	0	1	0	0	1	1	0	0
Nowellia curvifolia (Dicks.) Mitt.	0	0	0	0	1	0	0	0	0	0	0	0	0	0	0	1	1	0	0	0	0	1	1	0	0
Obtusifolium obtusum (Lindb.) S.W.Arnell	0	0	0	0	1	0	0	0	0	0	0	0	1	0	0	1	0	0	0	1	1	0	0	0	0
Odontoschisma denudatum (Mart.) Dumort.	0	0	0	1	1	0	0	0	0	0	0	0	0	0	1	0	0	0	0	0	0	0	1	0	0
Odontoschisma elongatum (Lindb.) A.Evans	1	0	0	0	0	0	0	0	0	0	0	0	0	0	0	0	0	0	0	1	1	0	1	0	0
Odontoschisma fluitans (Nees) L.Söderstr. et Váňa	1	1	1	0	1	0	0	0	1	0	0	0	0	0	0	0	0	0	0	0	1	0	0	0	0
Odontoschisma francisci (Hook.) L.Söderstr. et Váňa	1	1	0	0	1	0	0	0	0	0	0	0	0	0	0	0	0	0	0	1	1	0	0	0	0
Odontoschisma jishibae (Steph.) L.Söderstr. et Váňa	0	0	0	0	1	0	0	0	1	0	0	0	0	0	0	0	0	0	0	0	0	0	0	0	0
Odontoschisma macounii (Austin) Underw.	0	0	0	0	1	0	1	0	0	0	1	0	0	1	0	0	0	0	0	1	0	0	0	0	0
Pallavicinia levieri Schiffn.	1	0	0	0	0	0	0	0	0	0	0	0	0	0	0	1	0	0	0	0	0	0	0	0	0
Pallavicinia lyellii (Hook.) Gray	0	0	0	0	1	0	0	0	0	0	0	0	0	0	0	0	0	0	0	0	0	0	0	0	0
Pallavicinia subciliata (Austin) Steph.	0	0	0	0	0	0	0	0	0	0	0	0	0	0	0	0	1	0	0	0	0	0	0	0	0
Pedinophyllum interruptum (Nees) Kaal.	0	0	0	1	0	1	0	0	0	0	0	0	0	0	1	0	0	0	0	0	0	0	1	0	0
Pedinophyllum truncatum (Steph.) Inoue	0	0	1	1	1	1	0	0	0	0	0	0	0	0	1	1	1	0	0	0	0	0	1	1	0
Pellia endiviifolia (Dicks.) Dumort.	1	1	1	1	1	1	1	1	1	0	0	0	0	0	1	1	1	1	1	1	0	0	0	0	1
Pellia epiphylla (L.) Corda	0	0	1	0	0	0	0	0	0	0	0	0	0	0	0	1	0	0	0	0	0	0	0	0	0
Pellia neesiana (Gottsche) Limpr.	1	1	1	1	1	1	0	1	1	1	1	1	1	0	1	0	0	1	1	1	1	1	1	1	1
Peltolepis quadrata (Saut.) Müll.Frib.	0	0	0	0	0	0	1	0	0	0	1	1	0	1	0	0	0	0	1	0	1	1	1	0	1
Plagiochasma japonicum (Steph.) C.Massal.	0	0	0	0	0	0	0	0	0	0	0	0	0	0	0	0	0	0	0	0	0	0	1	1	0
Plagiochasma pterospermum C. Massal.	0	0	0	0	0	0	0	0	0	0	0	0	0	0	0	0	0	0	0	0	0	1	1	0	0
Plagiochila arctica Bryhn et Kaal.	0	0	0	0	0	0	1	0	0	0	0	1	1	1	0	0	0	0	0	0	1	1	0	0	1
Plagiochila duthiana Steph.	0	0	0	0	0	0	0	0	0	0	0	0	0	0	0	1	0	0	0	0	0	0	0	0	0
Plagiochila hakkodensis Steph.	0	0	0	0	0	0	0	0	0	0	0	0	0	0	1	0	0	0	0	0	0	0	0	1	0
Plagiochila ovalifolia Mitt.	1	0	1	1	0	1	1	0	1	0	0	0	0	0	1	0	1	0	0	0	0	1	1	1	0
Plagiochila porelloides (Torr. ex Nees) Lindenb.	0	1	1	1	1	0	0	0	0	0	0	0	0	1	1	1	0	0	1	1	1	1	1	0	1
Plagiochila satoi S. Hatt.	1	0	0	0	0	0	0	0	0	0	0	0	0	0	0	0	1	0	0	0	0	0	1	0	1
Plagiochila sciophila Nees.	0	0	0	0	0	0	0	0	0	0	0	0	0	0	1	1	0	1	0	0	0	0	0	0	0
Plagiochila semidecurrens (Lehm. et Lindenb.) Lindenb.	0	0	0	0	0	0	0	0	0	0	0	0	0	0	1	0	0	0	0	0	0	0	0	0	0
Plagiochila sichotensis Bakalin & Vilnet	0	0	0	0	0	0	0	0	0	0	0	0	0	0	0	0	0	0	0	0	0	0	1	0	0
Plagiochila trabeculata Steph.	0	0	0	0	0	0	0	0	0	0	0	0	0	0	1	0	0	0	0	0	0	0	0	0	0
Plectocolea erecta Amakawa	0	0	0	0	0	0	0	0	0	0	0	0	0	0	1	1	0	0	0	0	0	0	0	0	0
Plectocolea hattoriana Amakawa	1	0	0	1	0	0	0	0	0	0	0	0	0	0	0	0	0	0	0	0	0	0	0	0	0
Plectocolea infusca Mitt.	1	1	1	1	1	0	0	0	0	0	0	0	0	0	1	1	1	0	0	0	0	0	1	1	0
Plectocolea infusca Mitt. var. recondita Bakalin	0	1	0	0	0	0	0	0	0	0	0	0	0	0	0	0	0	0	0	0	0	0	1	1	0
Plectocolea kurilensis (Bakalin) Bakalin et Vilnet	1	1	0	0	0	0	0	0	0	0	0	0	0	0	0	0	0	0	0	0	0	0	1	0	0
Plectocolea ovalifolia (Amakawa) Bakalin et Vilnet	1	0	1	1	1	1	0	1	0	0	0	0	0	0	0	0	0	1	1	0	1	0	1	1	0
Plectocolea rigidula S.Hatt.	0	0	0	1	1	0	0	0	0	0	0	0	0	0	0	0	0	0	0	0	0	0	0	0	0
Plectocolea rosulans (Steph.) S.Hatt.	0	0	0	0	0	0	0	0	0	0	0	0	0	0	1	0	0	0	0	0	0	0	0	0	0
Plectocolea rupicola (Amakawa) Bakalin	0	0	1	0	1	0	0	0	0	0	0	0	0	0	0	0	0	0	0	0	0	0	0	0	0
Plectocolea tortycalyx (Steph.) S. Hatt.	0	0	0	0	0	0	0	0	0	0	0	0	0	0	0	0	1	0	1	0	0	0	0	0	0
Plectocolea truncata (Nees) Bakalin	0	0	0	0	0	0	0	0	0	0	0	0	0	0	0	1	0	0	0	0	0	0	0	0	0
Plectocolea virgata Mitt.	0	0	0	0	0	0	0	0	0	0	0	0	0	0	1	0	1	1	1	0	0	0	0	0	0
Plectocolea vulcanicola (Schiffn.) Bakalin	1	1	0	1	1	0	0	0	0	0	0	0	0	0	0	0	0	0	0	0	0	0	0	0	0
Pleurocladula albescens (Hook.) Grolle	0	0	0	0	0	0	0	0	0	0	1	0	0	0	0	0	0	0	0	0	0	1	0	0	1
Plicanthus birmensis (Steph.) R.M.Schust.	0	0	0	0	0	0	0	0	0	0	0	0	0	0	1	0	0	0	0	0	0	0	1	1	0
Plicanthus hirtellus (F.Weber) R.M.Schust.	0	0	0	0	0	0	0	0	0	0	0	0	0	0	1	0	0	0	0	0	0	0	0	0	0
Porella caespitans (Steph.) S.Hatt.	0	0	0	0	0	0	0	0	0	0	0	0	0	0	1	0	0	0	0	0	0	1	1	1	0
Porella chinensis (Steph.) S.Hatt.	0	0	0	0	0	0	1	0	0	0	0	0	0	0	0	0	0	0	0	0	0	0	1	0	0
Porella densifolia (Steph.) S.Hatt.	0	0	0	0	0	0	0	0	0	0	0	0	0	0	0	0	0	0	0	0	0	0	0	0	0
Porella faurieri (Steph.) S.Hatt.	1	1	0	1	1	1	0	0	0	0	0	0	0	0	1	0	1	0	1	0	0	0	1	1	0
Porella gracillima Mitt.	0	0	0	0	0	1	0	0	0	0	0	0	0	0	1	1	0	1	0	0	0	1	1	1	0
Porella grandiloba Lindb.	0	0	0	0	1	1	1	0	0	0	0	0	0	0	1	0	1	1	0	0	0	1	1	1	0
Porella japonica (Sande Lac.) Mitt.	0	0	0	0	0	0	0	0	0	0	0	0	0	0	1	0	0	0	0	0	0	0	0	0	0
Porella oblongifolia S.Hatt.	0	0	0	0	0	0	0	0	0	0	0	0	0	0	1	1	0	0	0	0	0	0	1	0	0
Porella platyphylla (L.) Pfeiff.	0	0	0	0	0	1	0	0	0	0	0	0	0	0	0	1	0	0	0	0	1	1	1	0	0
Porella spinulosa (Steph.) S.Hatt.	0	0	0	0	0	0	0	0	0	0	0	0	0	0	0	0	0	0	0	0	0	0	0	1	0
Porella tosana (Steph.) S.Hatt.	0	0	0	0	0	0	0	0	0	0	0	0	0	0	0	0	0	0	0	0	0	0	0	0	0
Porella ulophylla (Steph.) S.Hatt.	0	0	0	0	0	0	0	0	0	0	0	0	0	0	1	0	0	0	0	0	0	1	1	1	0
Porella vernicosa Lindb.	0	0	0	0	0	0	0	0	0	0	0	0	0	0	1	1	0	1	0	0	0	1	1	1	1
Prasanthus suecicus (Gottsche) Lindb.	0	0	0	0	0	0	0	1	0	0	0	0	0	0	0	0	0	0	0	0	1	0	0	0	1
Marchantia quadrata Scop.	1	0	1	1	1	0	1	1	0	0	1	1	1	1	0	1	0	0	1	1	1	1	1	0	1
Protosolenostoma fusiforme (Steph.) Vilnet et Bakalin	0	0	0	0	0	0	0	0	0	0	0	0	0	0	0	0	1	0	1	0	0	0	0	0	0
Pseudolepicolea fryei (Perss.) Grolle et Ando	0	0	0	0	0	0	0	0	0	0	0	0	0	1	0	0	0	0	0	0	0	0	0	0	0
Pseudolophozia debiliformis (R.M.Schust. et Damsh.) Konstant. et Vilnet var. debiliformis	1	1	1	1	0	0	1	0	0	0	1	1	1	0	0	0	0	0	0	1	0	1	1	0	1
Pseudolophozia sudetica (Nees ex Huebener) Konstant. et Vilnet	0	1	1	0	1	0	1	1	1	1	1	1	1	1	0	1	0	0	1	1	1	1	1	0	1
Pseudotritomaria heterophylla (R.M.Schust.) Konstant. et Vilnet	0	0	0	0	0	0	0	0	0	0	0	0	0	1	0	0	0	0	0	0	0	0	0	0	1
Ptilidium californicum (Austin) Pearson	0	1	0	0	0	0	1	1	1	0	0	0	0	0	0	0	0	0	0	0	1	1	0	0	0
Ptilidium ciliare (L.) Hampe	1	1	0	1	0	1	0	1	0	1	0	0	1	1	0	1	0	0	0	1	1	1	1	1	1
Ptilidium pulcherrimum (Weber) Vain.	1	1	1	1	1	1	1	1	1	1	1	1	0	1	0	1	1	0	1	1	0	1	1	0	1
Radula auriculata Steph.	0	0	0	0	0	0	0	0	0	0	0	0	0	0	1	0	0	0	0	0	0	0	1	0	0
Radula brunnea Steph.	0	0	0	1	0	0	0	0	0	0	0	0	0	0	0	0	0	0	0	0	0	0	0	0	0
Radula cavifolia Hampe ex Gottsche, Lindenb. et Nees	0	0	0	0	0	0	0	0	0	0	0	0	0	0	1	0	0	0	0	0	0	0	0	0	0
Radula complanata (L.) Dumort.	1	1	1	1	0	1	1	1	1	0	0	1	0	1	0	1	0	0	1	0	1	1	1	1	1
Radula constricta Steph.	1	1	0	1	0	1	0	0	1	0	0	0	0	0	1	0	1	1	1	0	0	1	1	1	0
Radula fauriana Steph.	0	0	0	0	0	0	0	0	0	0	0	0	0	0	0	0	1	0	1	0	0	0	0	0	0
Radula japonica Gottsche	1	1	1	1	1	1	0	0	0	0	0	0	0	0	1	0	1	0	1	0	0	0	1	0	0
Radula obtusiloba Steph.	1	1	1	1	1	1	1	0	0	0	0	0	0	1	1	0	1	1	1	0	0	1	1	1	0
Radula prolifera Arnell	0	0	0	0	0	0	0	0	0	0	1	0	0	1	0	0	0	0	0	1	1	1	0	0	1
Radula tokiensis Steph.	0	0	0	0	0	0	0	0	0	0	0	0	0	0	1	0	0	0	0	0	0	0	0	0	0
Reboulia hemisphaerica (L.) Raddi	0	0	0	0	0	1	0	0	0	0	0	0	0	0	1	0	0	0	0	0	0	1	1	1	0
Reboulia hemisphaerica (L.) Raddi subsp. australis R.M.Schust.	0	0	0	0	0	0	0	0	0	0	0	0	0	0	0	0	0	0	0	0	0	0	1	1	0
Reboulia hemisphaerica (L.) Raddi subsp. orientalis R.M.Schust.	1	0	0	1	1	0	0	0	0	0	0	0	0	0	0	0	1	0	1	0	0	1	1	1	1
Riccardia aeruginosa Furuki	0	0	0	1	1	0	0	1	0	0	0	0	0	0	0	0	0	0	0	0	1	0	0	0	0
Riccardia chamedryfolia (With.) Grolle	1	0	0	1	1	1	0	0	0	0	1	0	0	0	0	0	1	0	0	0	0	0	0	0	0
Riccardia changbaishanensis C.Gao	0	0	0	0	0	0	0	0	0	0	0	0	0	0	0	1	0	0	0	0	0	0	0	0	0
Riccardia decrescens (Steph.) S. Hatt.	0	0	0	0	0	0	0	0	0	0	1	0	0	0	1	0	0	0	0	0	0	0	0	0	0
Riccardia latifrons (Lindb.) Lindb.	0	0	0	1	1	1	0	0	0	1	0	0	1	0	0	1	1	0	0	1	1	1	1	0	0
Riccardia multifida (L.) Gray	1	1	1	1	1	0	0	0	0	0	1	0	0	0	0	0	1	0	1	0	0	0	0	0	0
Riccardia palmata (Hedw.) Carruth.	0	0	1	1	1	1	0	0	1	1	0	0	1	0	0	1	1	0	0	1	0	1	1	1	1
Riccardia planiflora (Steph.) S.Hatt.	0	0	0	0	0	0	0	0	0	0	0	0	0	0	0	0	1	0	0	0	0	0	0	0	0
Riccardia subalpina Furuki	0	1	0	0	0	0	0	0	0	0	0	0	0	0	0	0	0	0	0	0	0	0	0	0	0
Riccardia vitrea Furuki	0	1	0	0	0	0	0	0	0	0	0	0	0	0	0	0	0	0	0	0	0	0	0	0	0
Riccia beyrichiana Hampe	0	0	0	0	0	0	0	0	0	0	0	0	0	0	0	0	0	0	0	0	0	0	0	1	0
Riccia bifurca Hoffm.	0	0	0	0	0	0	0	0	0	0	0	0	0	0	0	0	0	0	0	0	0	0	0	1	1
Riccia fluitans L.	1	0	0	0	0	0	0	0	0	0	0	0	0	0	0	0	0	0	0	0	0	0	1	0	0
Riccia frostii Austin	0	0	0	0	0	0	0	0	0	0	0	0	0	0	0	1	0	0	0	0	0	0	0	0	0
Riccia glauca L.	0	0	0	0	0	0	0	0	0	0	0	0	0	0	0	0	0	0	0	0	0	0	0	0	0
Riccia huebeneriana Lindenb.	1	0	0	1	0	0	0	0	0	0	0	0	0	0	1	0	0	0	0	0	0	0	0	0	0
Riccia lamellosa Raddi	0	0	0	0	0	0	0	0	0	0	0	0	0	0	0	0	0	0	0	1	0	0	0	0	0
Riccia sorocarpa Bisch.	0	0	0	0	0	0	0	0	0	0	0	0	0	1	0	0	0	0	0	0	0	0	1	0	1
Ricciocarpos natans (L.) Corda	0	0	0	0	0	0	0	0	0	0	0	0	0	0	0	0	0	0	0	0	0	0	1	0	0
Saccobasis polita (Nees) H.Buch	0	0	0	0	0	0	1	0	0	0	1	0	0	0	0	0	0	0	0	1	1	0	0	0	0
Sauteria alpina (Nees) Nees	0	0	0	0	0	0	1	1	0	0	1	1	0	1	0	0	0	0	1	1	1	1	0	0	1
Scapania ampliata Steph.	0	0	0	0	1	0	0	0	0	0	0	0	0	0	1	0	1	0	0	0	0	0	0	0	0
Scapania apiculata Spruce	0	0	0	0	1	0	1	0	0	1	0	0	0	0	0	1	0	0	0	0	0	1	1	0	0
Scapania brevicaulis J.Taylor	0	0	0	0	0	0	0	0	0	0	0	0	0	1	0	0	0	0	0	1	0	0	1	0	0
Scapania carinthiaca J.B.Jack ex Lindb.	0	0	0	0	0	0	0	0	0	0	0	0	0	1	0	1	0	0	0	0	0	0	1	0	0
Scapania ciliata Sande Lac.	0	0	0	0	0	0	0	0	0	0	0	0	0	0	1	0	0	0	0	0	0	0	0	1	0
Scapania crassiretis Bryhn	0	1	0	0	0	0	1	0	0	0	0	0	0	1	0	0	0	1	0	0	0	1	1	0	1
Scapania curta (Mart.) Dumort.	1	1	0	0	0	1	1	0	0	0	1	1	0	1	0	1	0	0	1	1	1	1	0	0	0
Scapania cuspiduligera (Nees) Müll.Frib.	0	0	0	0	0	0	1	0	0	0	1	0	0	1	0	0	0	0	0	1	1	0	0	0	1
Scapania degenii Schiffn. ex Müll.Frib.	0	0	0	0	0	0	0	0	0	0	0	0	1	1	0	0	0	0	0	0	0	0	0	0	0
Scapania diplophylloides Amakawa et S.Hatt.	1	1	1	1	1	0	0	0	0	0	0	0	0	0	0	0	0	0	0	0	0	1	1	0	0
Scapania glaucocephala (Tayl.) Aust.	0	0	0	0	0	0	0	0	0	0	0	0	0	0	0	0	0	0	0	1	0	0	0	0	0
Scapania gymnostomophila Kaal.	0	0	0	0	0	0	0	0	0	0	0	0	0	1	0	0	0	0	0	0	0	1	1	0	1
Scapania hirosakiensis Steph.	0	0	1	1	1	0	0	0	0	0	0	0	0	0	0	0	1	0	0	0	0	0	0	0	0
Scapania hyperborea Jørg.	0	0	0	0	0	0	0	0	0	1	0	0	1	1	0	0	0	0	0	1	1	0	0	0	1
Scapania integerrima Steph.	0	0	0	1	1	0	0	0	0	0	0	0	0	0	1	0	0	0	1	0	0	0	0	0	0
Scapania irrigua (Nees) Nees	1	1	1	0	1	1	1	1	1	1	1	1	1	1	0	1	0	1	0	1	1	1	1	0	1
Scapania kaurinii Ryan	0	0	0	0	0	0	1	0	0	0	0	0	1	1	0	0	0	0	0	1	1	0	0	0	0
Scapania ligulata Steph.	0	0	1	1	0	0	0	0	0	0	0	0	0	0	0	0	0	1	0	0	0	0	1	0	0
Scapania ligulifolia (R.M.Schust.) R.M.Schust.	0	0	0	0	0	0	0	0	0	0	0	0	0	1	0	0	0	0	0	0	0	0	0	0	0
Scapania lingulata H.Buch	0	0	0	0	0	0	0	0	0	0	0	0	0	1	0	0	0	0	0	1	1	1	1	0	0
Scapania mucronata H.Buch	0	0	0	0	0	0	0	1	0	1	0	0	0	1	0	1	0	0	0	1	1	1	1	0	1
Scapania obcordata (Berggr.) S.W.Arnell	0	0	0	0	0	0	0	0	0	1	1	1	1	1	0	0	0	0	0	0	0	0	0	0	0
Scapania obscura (Arnell et C.E.O. Jens.) Schiffn.	0	0	0	0	0	0	0	0	0	0	0	0	0	0	0	0	0	0	0	1	1	0	0	0	0
Scapania paludicola Loeske et Müll.Frib.	1	1	1	1	1	0	0	1	1	1	1	0	1	1	0	1	0	0	1	1	1	1	1	0	1
Scapania paludosa (Müll.Frib.) Müll.Frib.	0	1	1	1	1	0	1	1	1	0	1	1	0	0	0	0	0	0	0	1	1	0	0	0	0
Scapania parvidens Steph.	1	1	0	0	0	0	0	0	0	0	0	0	0	0	0	1	1	0	0	0	0	0	0	0	0
Scapania parvifolia Warnst.	1	0	0	0	1	1	1	0	1	1	0	1	1	1	0	1	0	0	0	1	1	1	1	0	1
Scapania parvitexta Steph.	1	0	1	1	1	0	0	0	0	0	0	0	0	0	1	0	0	0	1	0	0	0	1	1	0
Scapania praetervisa Meyl.	0	0	0	0	0	0	0	0	0	0	0	0	0	1	0	0	0	0	0	0	0	0	1	0	0
Scapania rufidula Warnst.	0	0	0	0	0	0	0	0	0	0	0	0	0	0	0	0	0	0	0	0	0	1	0	0	1
Scapania scandica (Arnell et H.Buch) Macvicar	1	0	0	1	0	1	0	0	0	0	0	0	0	0	0	0	0	0	0	0	0	0	0	0	0
Scapania simmonsii Bryhn et Kaal.	0	0	0	0	0	0	0	0	0	0	0	0	0	1	0	0	0	0	0	0	0	0	0	0	0
Scapania sphaerifera H.Buch et Tuom.	0	0	0	0	0	0	1	0	0	1	0	0	1	1	0	0	0	0	0	0	0	1	1	0	1
Scapania spitsbergensis (Lindb.) Müll.Frib.	0	0	0	0	0	0	0	0	0	0	0	0	1	1	0	0	0	0	0	0	0	1	0	0	0
Scapania stephanii Müll.Frib.	0	0	0	0	0	0	0	0	0	0	0	0	0	0	0	0	1	0	0	0	0	0	0	0	0
Scapania subalpina (Nees ex Lindenb.) Dumort.	0	1	1	0	1	0	0	1	1	1	1	1	1	1	0	1	0	0	0	1	1	1	1	0	0
Scapania subnimbosa Steph.	0	0	0	0	0	0	0	0	0	0	0	0	0	0	0	0	1	0	0	0	0	0	0	0	0
Scapania tundrae (Arnell) H. Buch	0	0	0	0	0	0	0	0	0	0	0	0	0	0	0	0	0	0	0	1	0	0	0	0	0
Scapania uliginosa (Lindenb.) Dumort.	1	0	0	1	0	0	0	0	0	0	0	0	0	0	0	0	0	0	0	1	0	0	0	0	0
Scapania umbrosa (Schrad.) Dumort.	0	0	0	0	1	0	0	0	0	0	0	0	0	0	0	0	0	0	0	1	0	0	0	0	0
Scapania undulata (L.) Dumort.	1	1	1	1	1	1	0	1	0	0	1	0	0	0	1	0	1	1	1	1	1	0	1	0	0
Scapania verrucosa Heeg	0	0	0	0	0	0	0	0	0	0	0	0	0	0	0	0	0	0	0	0	0	0	1	0	0
Schistochilopsis cornuta (Steph.) Konstant.	0	0	1	1	1	1	1	0	0	0	0	0	0	0	0	0	1	0	0	0	0	1	1	1	0
Schistochilopsis grandiretis (Lindb. ex Kaal.) Konstant.	0	0	0	0	0	0	1	0	0	0	1	1	1	1	0	0	0	0	0	1	0	1	0	0	1
Schistochilopsis hyperarctica (R.M.Schust.) Konstant.	0	0	0	0	0	0	1	0	0	0	0	0	0	0	0	0	0	0	0	1	0	0	0	0	0
Schistochilopsis incisa (Schrad.) Konstant.	1	1	1	1	1	1	1	1	1	1	1	1	1	1	1	1	1	1	0	1	1	1	1	0	1
Schistochilopsis opacifolia (Culm. ex Meyl.) Konstant.	0	0	0	0	0	0	0	0	0	0	0	0	0	0	0	0	0	0	0	0	0	0	0	0	0
Schistochilopsis pacifica	1	0	0	0	0	0	0	0	0	0	1	0	0	0	0	0	0	0	0	0	0	0	0	0	0
Schljakovia kunzeana (Huebener) Konstant. et Vilnet	0	0	0	0	0	0	1	1	0	1	0	1	1	1	0	0	0	1	0	1	1	1	0	0	1
Schljakovianthus quadrilobus (Lindb.) Konstant. et Vilnet	0	0	0	0	0	0	1	0	0	0	1	0	0	1	0	0	0	0	0	1	0	0	0	0	0
Solenostoma bilobum (Amakawa) Potemkin et Nyushko	0	0	0	1	0	0	0	0	0	0	0	0	0	0	0	0	1	0	1	0	0	0	0	0	0
Solenostoma confertissimum (Nees) Schljakov	0	0	0	0	0	0	0	0	0	1	0	0	0	1	0	0	0	0	0	1	0	1	0	0	1
Solenostoma emarginatum (Amakawa) Váňa	0	0	0	0	0	0	0	0	0	0	0	0	0	0	1	0	1	0	0	0	0	0	0	0	0
Solenostoma fusiforme (Steph.) R.M.Schust.	0	0	0	1	1	0	0	0	0	0	0	0	0	0	0	0	0	0	0	0	0	0	0	0	0
Solenostoma hokkaidense (Váňa) Váňa, Hentschel et Heinrichs	1	0	0	0	0	0	0	0	0	0	0	0	0	0	0	0	0	0	1	0	0	0	0	0	0
Solenostoma hyalinum (Lyell) Mitt.	1	1	0	1	1	0	1	0	1	0	0	0	0	1	1	0	0	1	0	1	1	0	0	0	0
Solenostoma koreanum Steph.	0	0	0	0	1	0	0	1	0	0	0	0	0	0	0	0	0	0	0	0	0	0	0	0	0
Solenostoma minutissimum (Amakawa) Bakalin, Vinet et Furuki	0	0	0	0	0	0	0	0	0	0	0	0	0	0	0	0	0	0	1	1	0	0	0	0	0
Solenostoma obovatum (Nees) R.M. Schust	1	0	0	0	0	0	0	1	1	0	0	0	0	0	0	1	0	0	0	0	1	0	1	0	0
Solenostoma obscurum (A. Evans) R.M. Schust.	0	0	0	0	0	0	0	0	0	0	0	0	0	0	0	0	0	0	0	0	0	1	1	0	1
Solenostoma pseudopyriflorum Bakalin et Vilnet	0	0	1	1	0	0	1	0	1	0	0	0	0	0	0	0	0	0	0	0	0	1	1	0	0
Solenostoma pusillum (C.E.O.Jensen) Steph.	0	0	0	0	0	0	0	0	0	0	1	0	1	0	0	0	0	0	0	1	0	0	0	0	0
Solenostoma pyriflorum Steph.	0	0	0	0	0	0	0	0	0	0	0	0	0	0	1	1	1	0	1	0	0	1	0	0	0
Solenostoma rishiriense Amakawa	0	0	0	0	1	0	1	0	0	0	0	0	0	0	0	0	0	0	0	0	0	0	0	0	0
Solenostoma rossicum Bakalin et Vilnet	1	1	0	0	0	0	0	0	0	1	1	1	1	1	0	0	0	0	0	0	0	1	1	0	1
Solenostoma rotundatum Amakawa	1	0	1	0	0	0	0	0	0	0	0	0	0	0	0	0	0	0	0	0	0	0	0	0	0
Solenostoma sphaerocarpum (Hook.) Steph. var. nanum (Nees) Mull. Frib. in Rabenh.	0	0	0	0	0	0	0	0	0	0	0	0	1	0	0	0	0	0	0	1	1	0	0	0	0
Solenostoma sphaerocarpum (Hook.) Steph. var. sphaerocarpum	0	0	0	0	1	1	1	0	0	0	1	1	0	1	0	1	0	0	0	1	0	0	0	0	0
Solenostoma subellipticum (Lindb. ex Heeg) R.M.Schust.	0	0	0	0	0	0	1	1	0	0	1	1	1	1	0	1	0	0	0	1	1	1	0	0	0
Sphenolobopsis pearsonii (Spruce) R.M.Schust.	0	0	0	0	0	0	0	0	0	0	0	0	0	0	0	0	0	0	0	0	0	0	0	0	0
Sphenolobus cavifolius (H.Buch et S.W.Arnell) Müll.Frib.	0	0	0	0	0	0	0	0	0	0	0	0	0	1	0	0	0	0	0	1	0	0	0	0	0
Sphenolobus minutus (Schreb.) Berggr.	1	1	0	0	1	1	1	1	1	1	0	1	1	1	0	1	0	1	1	1	1	1	1	0	1
Sphenolobus saxicola (Schrad.) Steph.	0	0	0	0	0	1	1	0	1	1	0	0	1	1	0	1	0	0	0	1	0	1	1	0	1
Syzygiella autumnalis (DC.) K.Feldberg, Váňa, Hentschel et Heinrichs	1	0	1	1	1	1	1	0	0	0	0	0	0	0	1	1	1	0	1	0	0	1	1	1	0
Syzygiella nipponica (S. Hatt.) K. Feldberg, Váňa, Hentschel & Heinrichs	0	0	0	0	0	0	0	0	0	0	0	0	0	0	0	0	0	0	0	0	0	0	0	0	0
Targionia hypophylla L.	0	0	0	0	0	0	0	0	0	0	0	0	0	0	0	0	0	0	0	0	0	0	1	1	0
Tetralophozia filiformis (Steph.) Urmi	0	0	0	0	0	0	0	0	0	0	0	0	0	0	1	0	0	0	0	0	0	0	0	0	0
Tetralophozia setiformis (Ehrh.) Schljakov	0	0	0	0	0	1	0	1	0	1	0	1	1	1	0	0	0	0	0	1	0	1	1	0	1
Trichocolea tomentella (Ehrh.) Dumort.	0	0	0	1	1	0	0	0	0	0	0	0	0	0	1	0	1	0	0	0	0	0	0	0	0
Trichocoleopsis sacculata (Mitt.) S.Okamura	0	0	0	0	0	0	0	0	0	0	0	0	0	0	1	0	1	1	0	0	0	0	0	1	0
Trilophozia quinquedentata (Huds.) Bakalin	0	1	1	1	1	1	1	1	1	1	1	1	1	1	0	1	0	1	1	1	1	1	1	1	1
Tritomaria exsecta (Schmidel) Schiffn. ex Loeske	1	0	1	1	1	1	1	0	0	1	0	0	0	1	0	1	0	0	1	0	0	1	1	1	1
Tritomaria exsectiformis (Breidl.) Schiffn. ex Loeske	0	0	0	0	0	0	0	0	0	1	0	0	0	1	0	1	0	0	0	1	0	0	0	0	0
Tritomaria scitula (Taylor) Jørg.	0	0	0	0	0	0	0	0	0	0	0	0	0	1	0	0	0	0	0	0	0	0	0	0	1
Wiesnerella denudata (Mitt.) Steph.	0	0	0	1	0	0	0	0	0	0	0	0	0	0	0	0	0	0	0	0	0	0	0	0	0
Xenochila integrifolia (Mitt.) Inoue	0	0	0	0	0	0	0	0	0	0	0	0	0	0	1	0	0	0	0	0	0	0	1	1	0
Anthoceros macounii M. Howe	0	0	0	0	0	0	0	0	0	0	0	0	0	0	0	0	0	0	0	0	0	0	0	0	0
Phaeoceros laevis (L.) Prosk	0	0	0	0	0	0	0	0	0	0	0	0	0	0	0	0	0	0	0	0	0	0	0	1	0
